# Supplementary material for: Cancer Immunotherapy Based on Carbon-Quantum-Dot Modified Cancer Cells
Source: Research Square preprint supplement (doi:10.21203/rs.3.rs-457550/v1), 2021-04-26
Supplement: Supplementary file 1 [file 17047f6118aff21b7c609ff9.pdf]

## Supplementary information

### **Cancer Immunotherapy Based on Carbon-Quantum-Dot Modified Cancer Cells**

Tao Liang#, Josh Haipeng Lei#, Jinsong Tao#, Sen Guo, Hanlu Gao, Lipeng Zhu,  
Yinning Zhou, You-Cheng Liu, Long Xi, Haibo Tong, Enshan Liu, Bohan Zhang, Heng  
Sun, Huiqi Zhang, Kathy Qian Luo, Qi Zhao, Tzu-Ming Liu, Defang Ouyang, Wei Ge,  
Ying Zheng\*, Chu-Xia Deng\*, Zikang Tang\*, Songnan Qu\*

\* Corresponding authors, emails: songnanqu@um.edu.mo; zktang@um.edu.mo;  
cxdeng@um.edu.mo; yzheng@um.edu.mo

# These authors contributed equally to this work.

#### **This PDF file includes:**

Figs. S1 to S21

Tables S1-S2

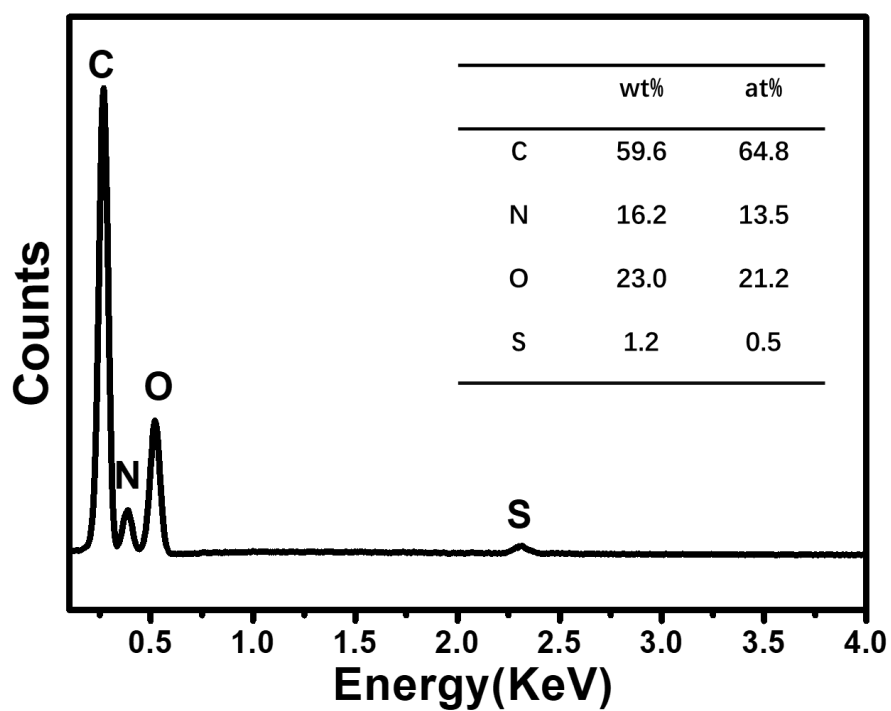

**Supplementary Fig. 1. EDS survey spectrum of CQDs.** The presence of C, O, N, and S elements are with weight contents of 59.6, 23.0, 16.2 and 1.2 %, respectively.

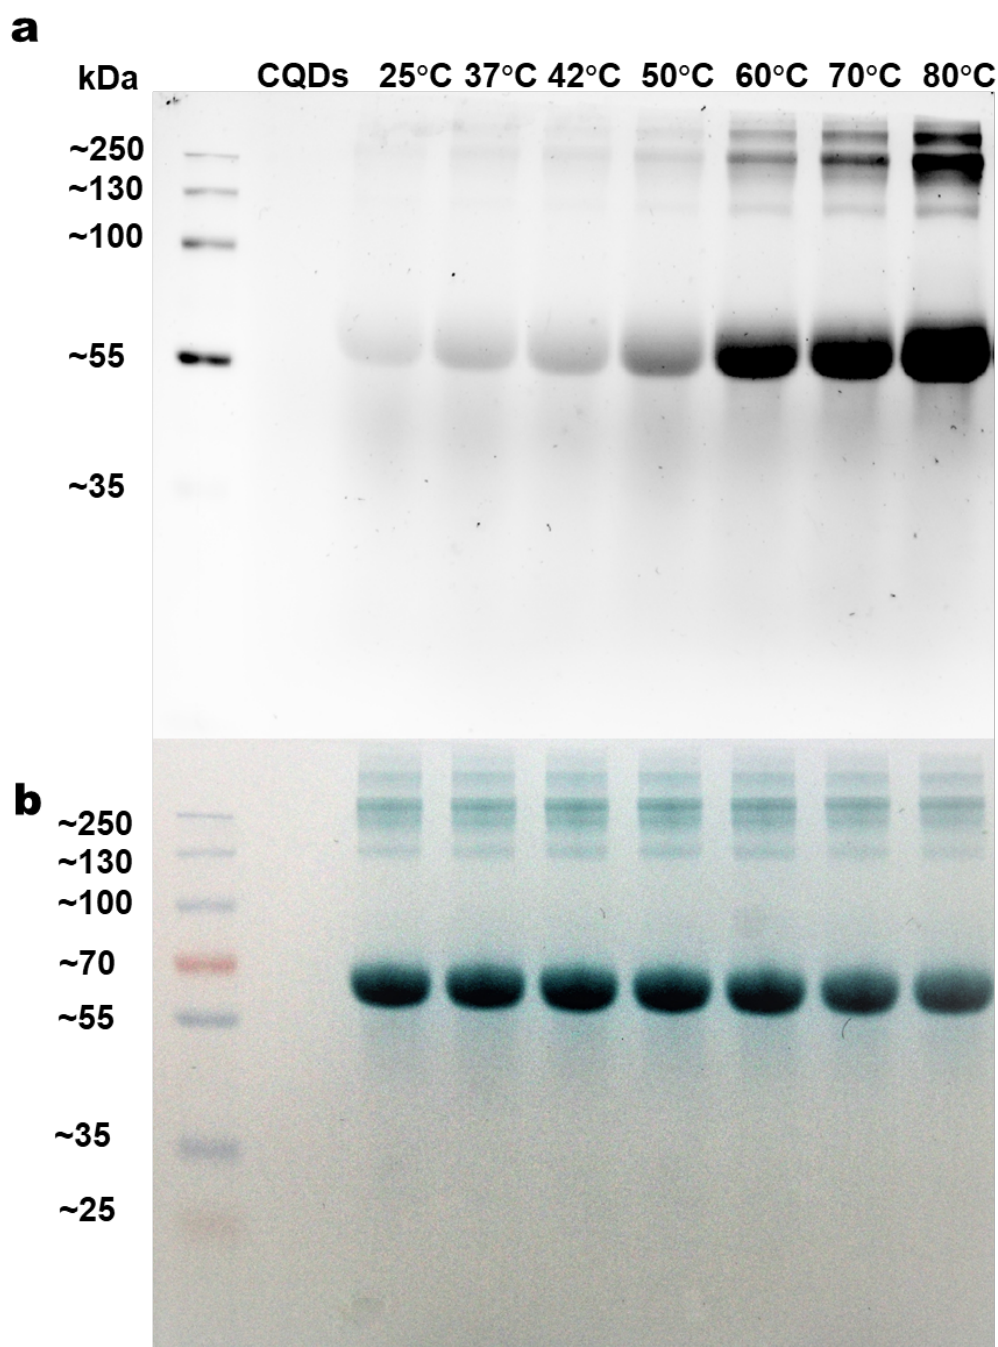

**Supplementary Fig. 2. SDS-PAGE patterns of pure CQDs, and BSA with CQDs after different temperature annealing. (a)** Fluorescence bands (excitation: 647 nm, filter: 710 nm); **(b)** Coomassie Brilliant Blue staining bands. From left to right: CQDs, BSA with CQDs after annealed at 25°C, 37°C, 42°C, 50°C, 60°C, 70°C, 80°C.

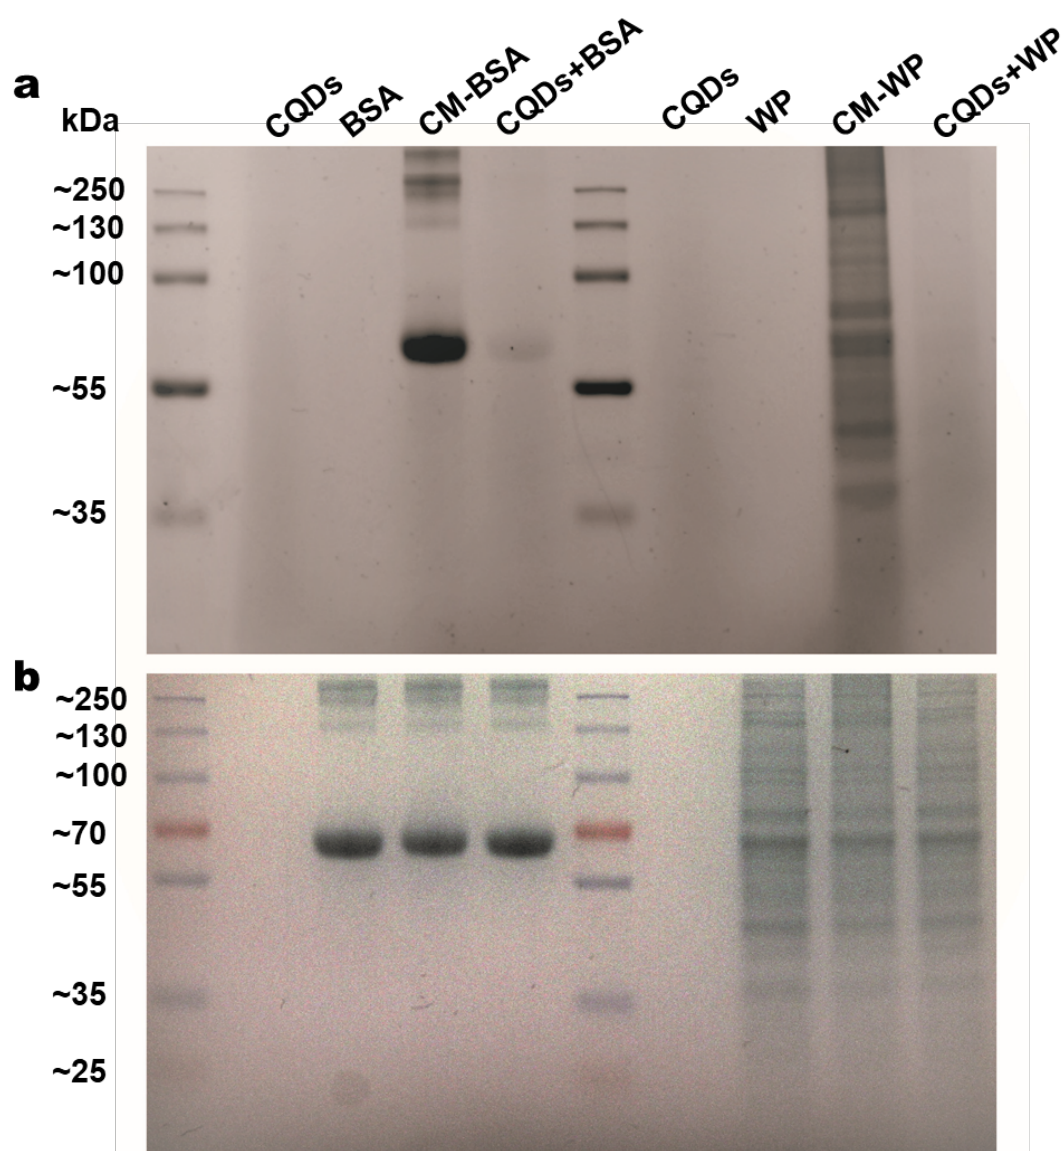

**Supplementary Fig. 3. SDS-PAGE patterns of CQDs, BSA, CM-BSA, CQDs+BSA, WP, CM-WP and CQDs+WP. (a) Fluorescence bands (excitation: 647 nm, filter: 710 nm); (b) Coomassie Brilliant Blue staining bands.**



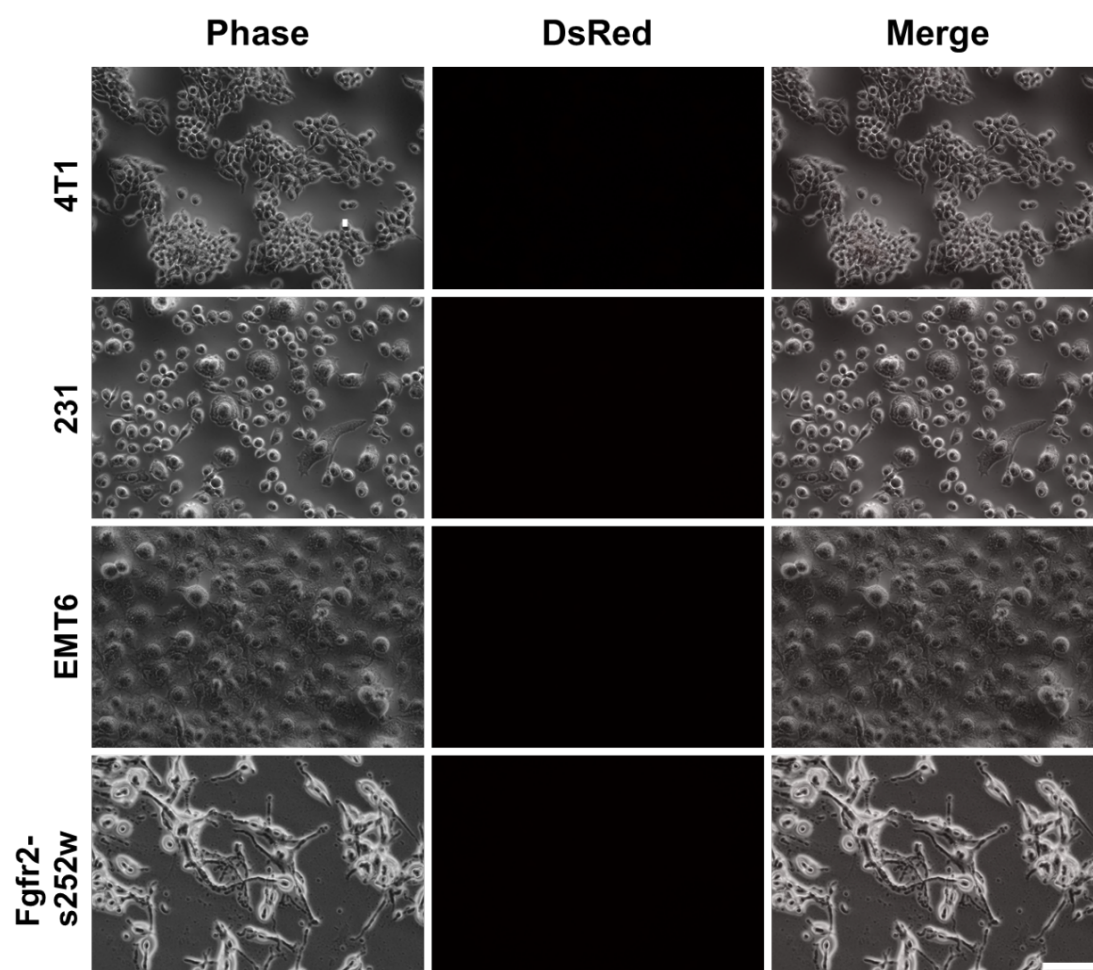

**Supplementary Fig. 4. Optical and fluorescence microscopy images of different cells groups co-incubated with CQDs for 24 hr.** CQDs cannot be actively ingested by living cells or bonded to the cell surfaces at body temperature. Cells are chosen from different cells such as 4T1, MDA-MB-231, EMT6 and tumor cells from *Fgfr2-S252W* model mice. Scale bar: 100  $\mu$ m.

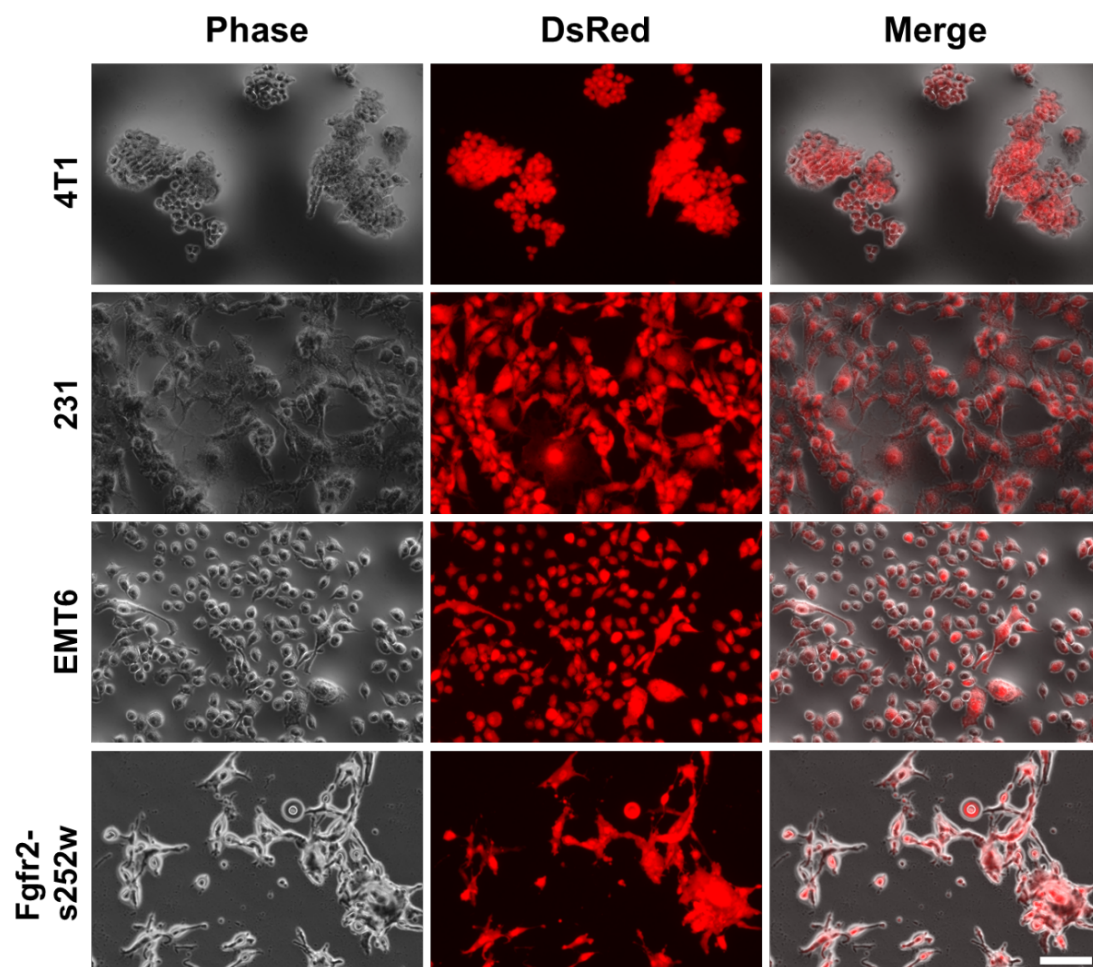

**Supplementary Fig. 5.** Optical and fluorescence microscopy images of different cells (4T1, MDA-MB-231, EMT6 and tumor cells from *Fgfr2-S252W* model mice) co-incubated with CQDs after annealing at 50 °C for 10 mins. Before imaging, the stock solution of the cancer cells was replaced by PBS. Scale bar: 100  $\mu$ m.

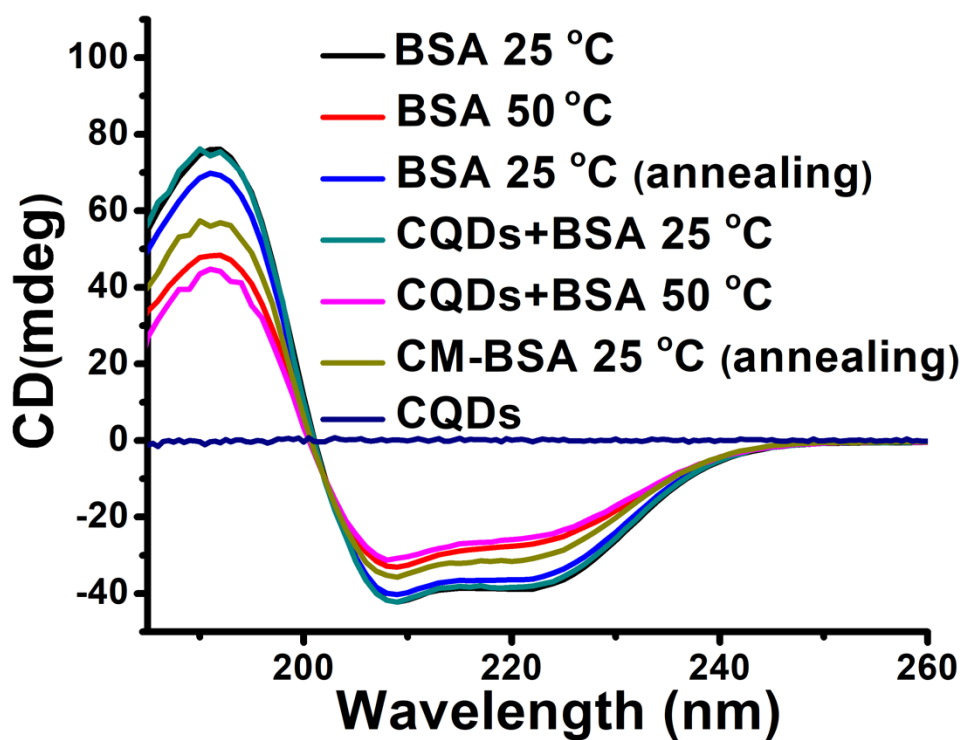

**Supplementary Fig. 6.** Circular dichroism spectra of CQDs, BSA and BSA+CQDs with or without thermal annealing in aqueous solutions at room temperature and BSA and BSA+CQDs in aqueous solutions at 50 °C. BSA and CQDs concentrations in the solutions are 50  $\mu\text{g/ml}$  and 10  $\mu\text{g/ml}$ , respectively.

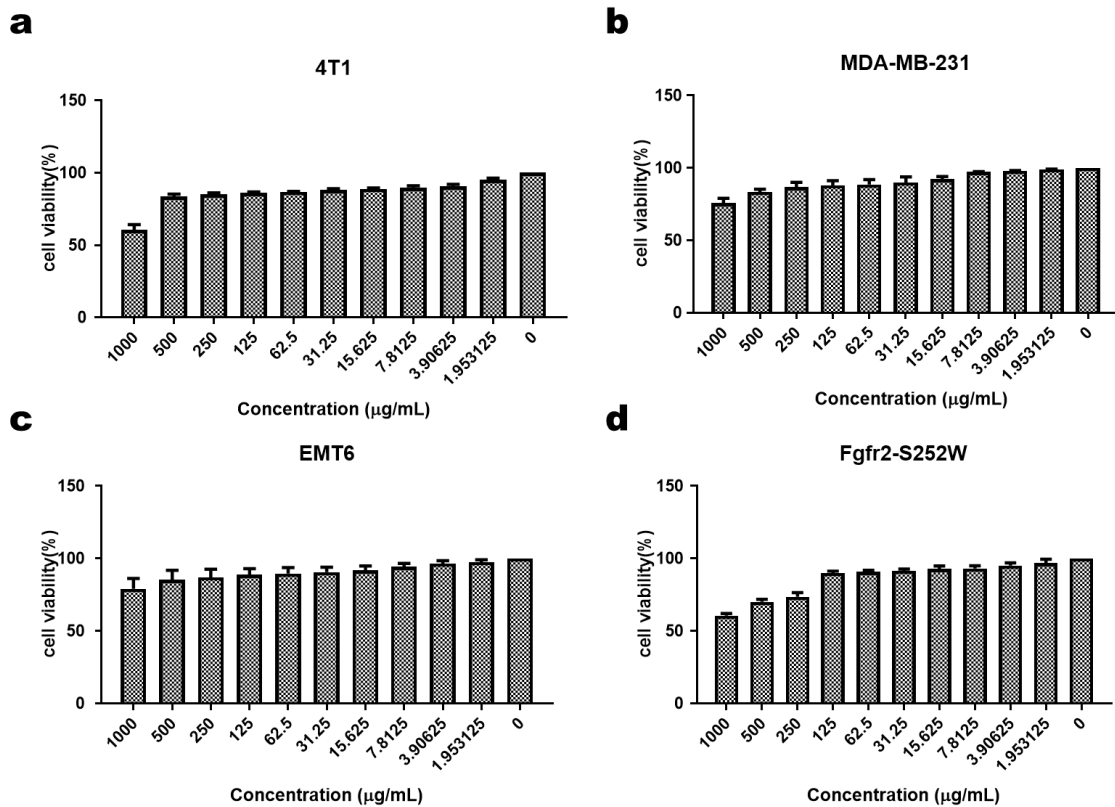

**Supplementary Fig. 7. Cytotoxicity of CQDs in different cells groups.** The CQDs did not affect cell viability even with concentrations up to 500 μg/ml after 48 h, indicating non- or extremely low cytotoxicity. Cells tested are (a) 4T1, (b) MDA-MB-231, (c) EMT6 and (d) *Fgfr2-S252W*.

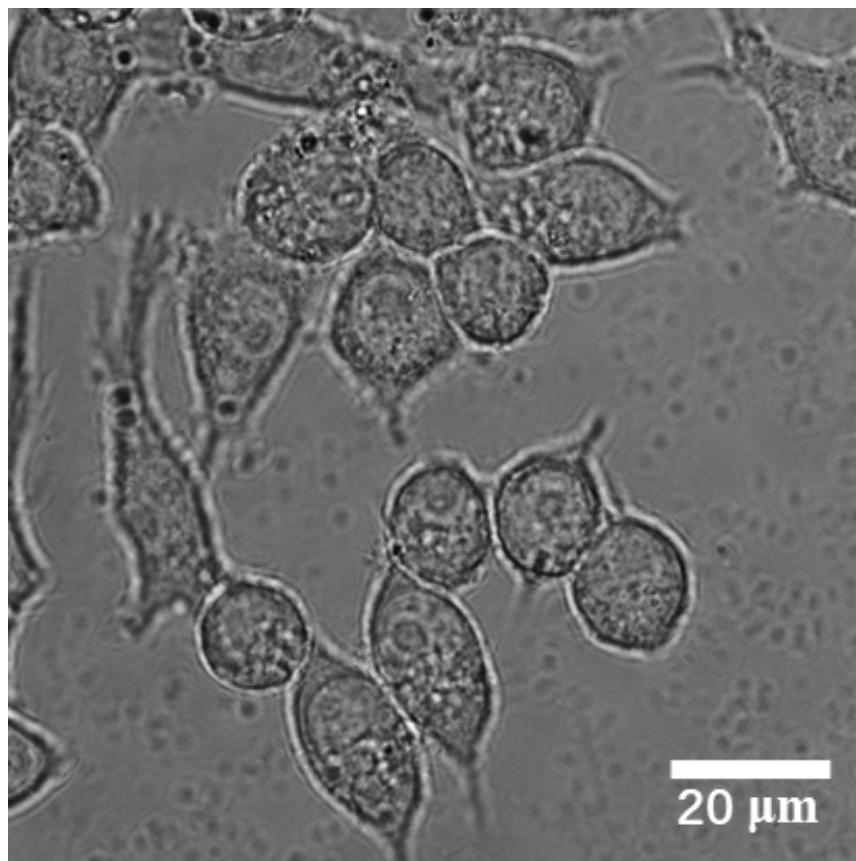

**Supplementary Fig. 8. CLSM image of RAW264.7 macrophage after co-incubating with PBS for 6 hr.**

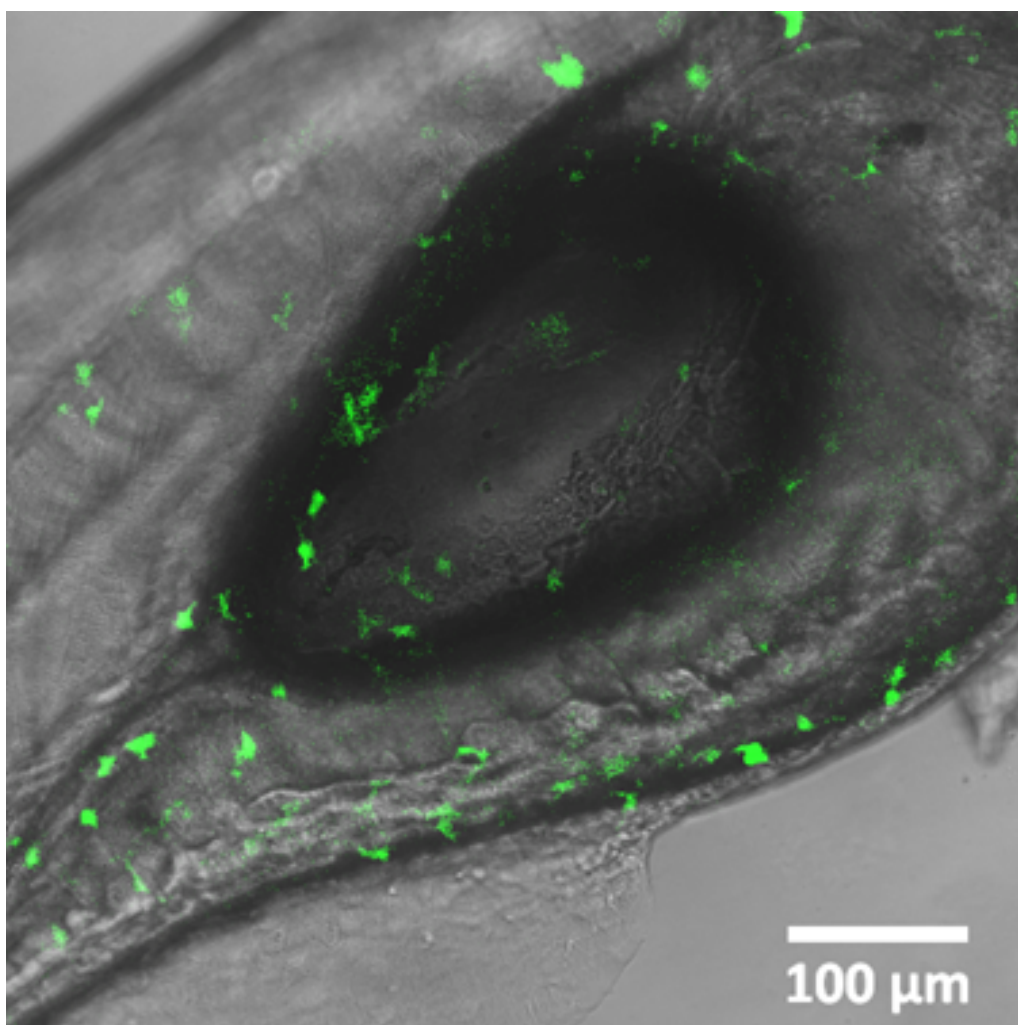

**Supplementary Fig. 9. CLSM image of macrophages in *Tg (mpeg1: EGFP)* zebrafish model**, which were injected abdominal with PBS at 4 nl after 6 hours. The fluorescence images were acquired at Ex 488 nm/Em 493–550 nm for EGFP signal under the independent sequence of channel with HyD detectors.



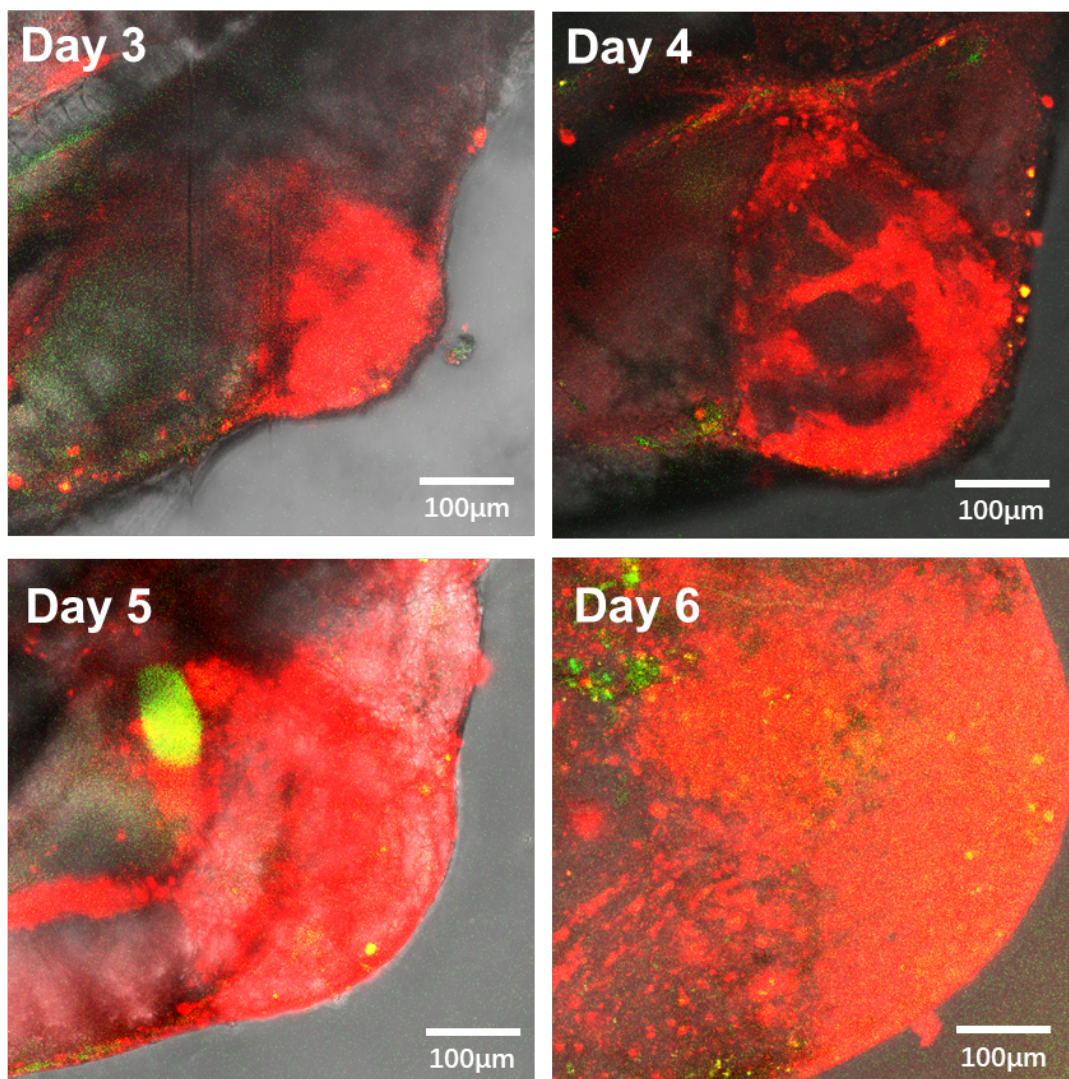

**Supplementary Fig. 10.** CLSM images of DiI labelled B16F10 cancer xenograft *Tg* (*lck:EGFP*) zebrafish model treated with PBS at 4 nl dose after different days. T cells (Green), B16F10 cells (Red). The fluorescence images were acquired at Ex 488 nm/Em 493–550 nm for EGFP signal and Ex 552 nm/Em 558–650 nm for DiI signal detection under the independent sequence of channel with HyD detectors.



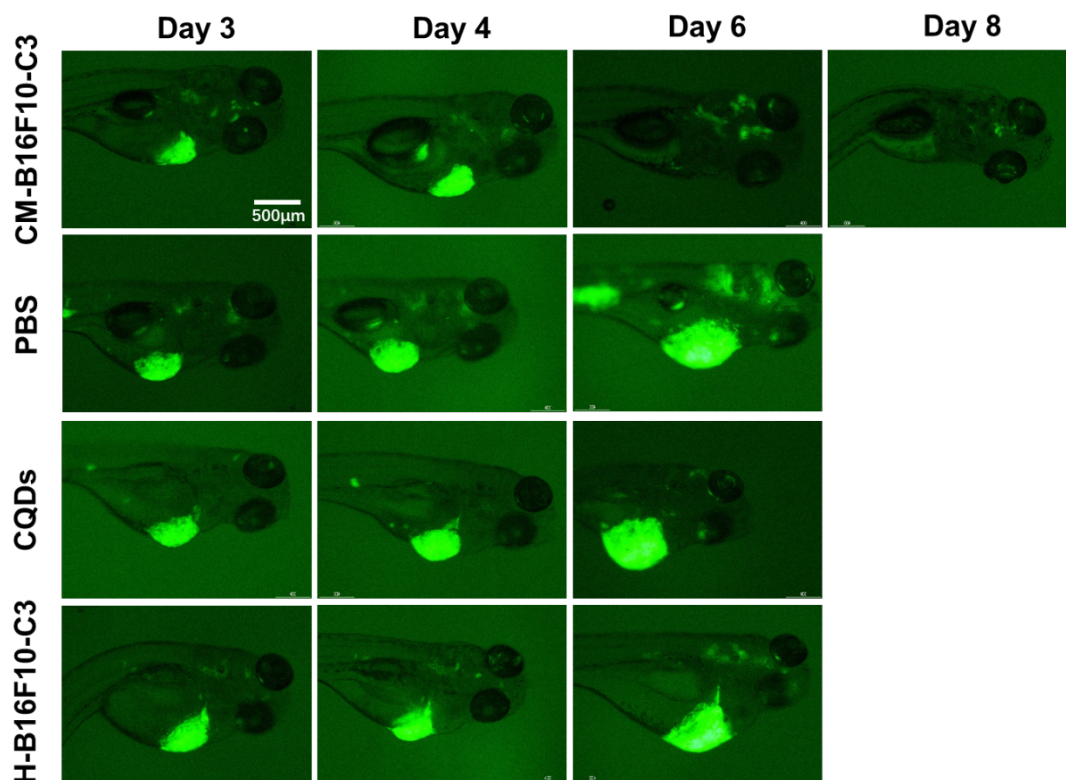

**Supplementary Fig. 11. Visual observation of the cancer growth by the YFP imaging under fluorescence microscope in B16F10-C3 cancer xenograft zebrafish model** treated with CM-B16F10-C3, PBS, CQDs, and H-B16F10-C3 at day 3, 4, 6 and 8, respectively. CQDs: 200 µg/ml, 4 nl. B16F10-C3 cells: 36. Green fluorescence areas represent B16F10-C3 cells.

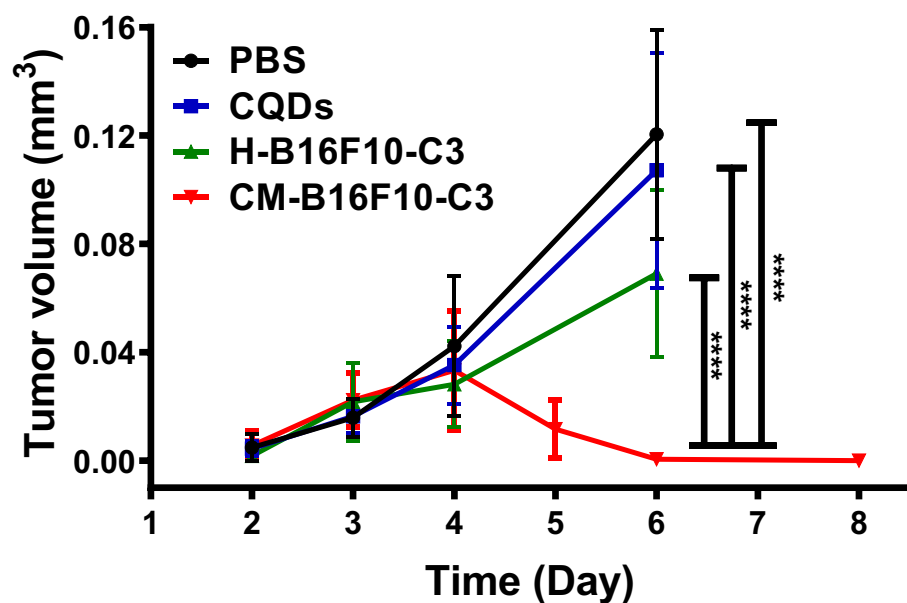

**Supplementary Fig. 12. Tumor growth curves of B16F10-C3 xenograft zebrafish model in control groups (PBS, CQDs and H-B16F10-C3) and treated group (CM-B16F10-C3). Growth curves represent means  $\pm$  SD. ( $n = 6$ ,  $p < 0.0001$ ).**

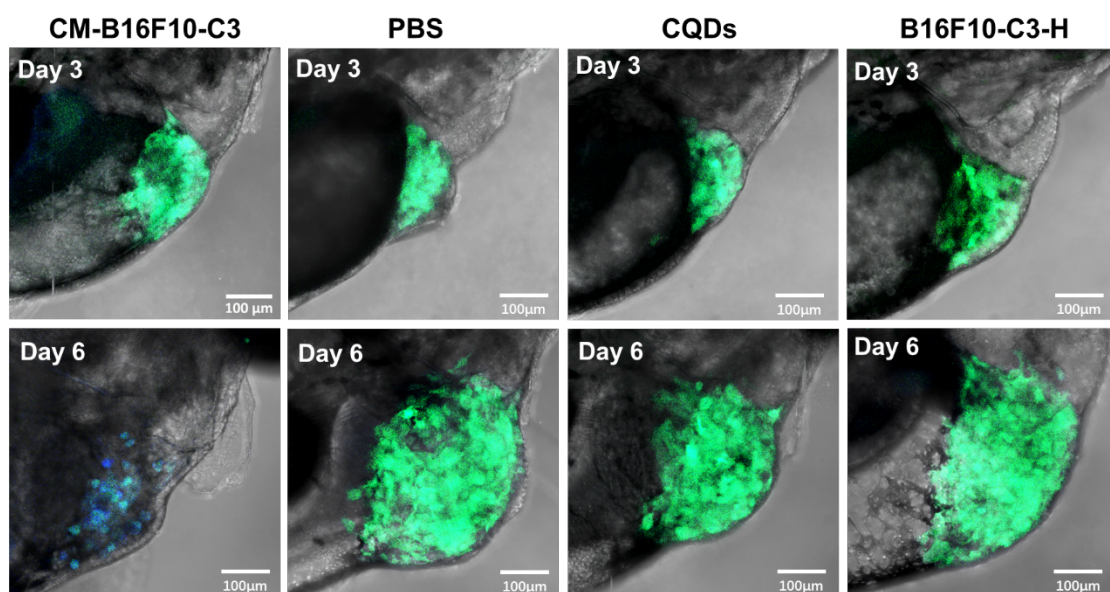

**Supplementary Fig. 13. CLSM images of monitoring the cancer cell proliferation growth (green fluorescence) and detect the caspase-3 activation based apoptotic (blue fluorescence) by FRET imaging in B16F10-C3 cancer xenograft zebrafish model before (day 3) and after (day 6) CM-B16F10-C3, PBS, CQDs and H-B16F10-C3 treatments, respectively.**

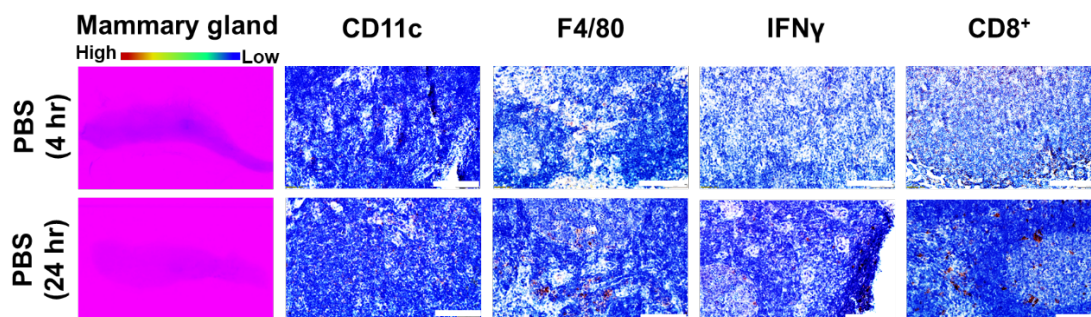

**Supplementary Fig. 14.** Fluorescent images of the 4th mammary tissue with inguinal lymph node (left); Balb/c mice were injected abdominal with PBS at dose of 200  $\mu$ l per mice; The mammary were collected after injection for 4 hr and 24 hr (Scale bar: 3 mm). IHC staining against CD11c, F4/80 IFN $\gamma$ , and CD8 $^{+}$  with PBS treatment group (Scale bar: 100  $\mu$ m).

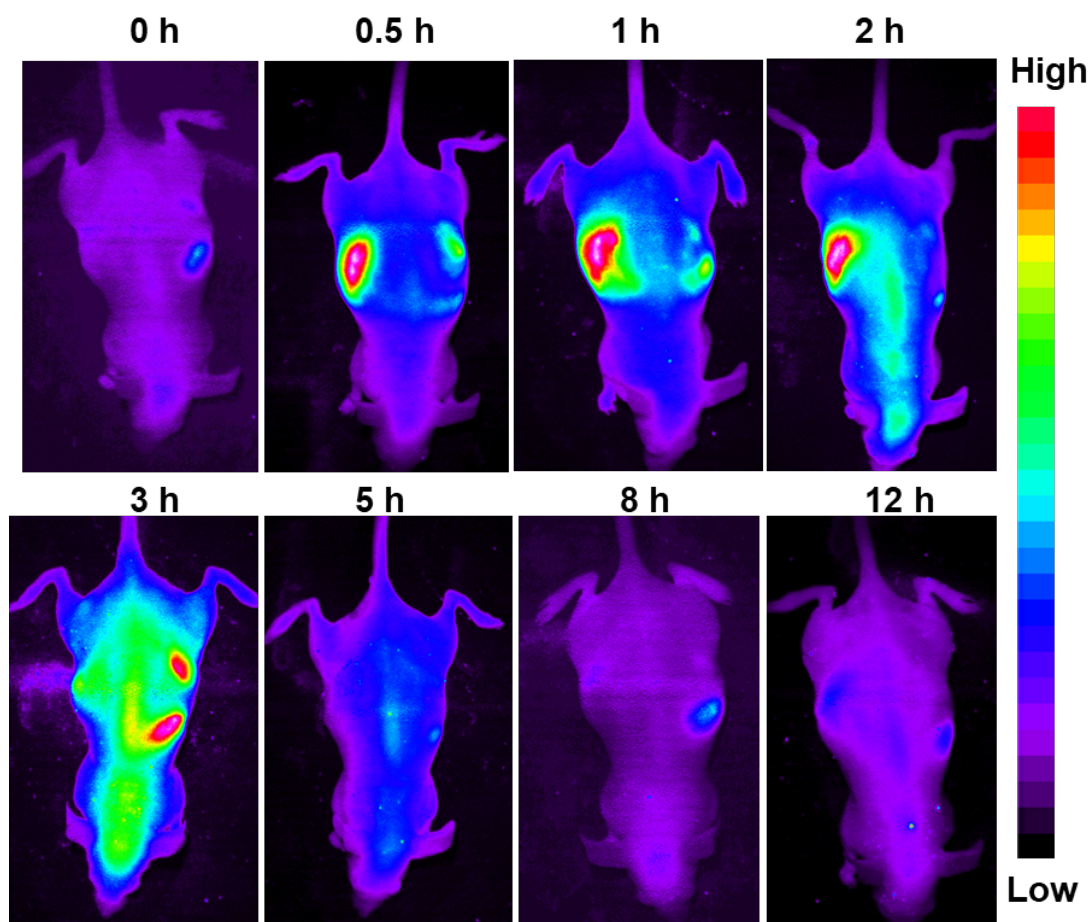

**Supplementary Fig. 15. NIR fluorescence images of a nude mouse before and after intraperitoneal injection of CM-4T1 at different time. CQDs : 200  $\mu\text{g}/\text{ml}$ , 100  $\mu\text{l}$  .4T1 cells:  $1 \times 10^7/\text{ml}$ . Excitation: 655 nm. Filter: 710 nm.**

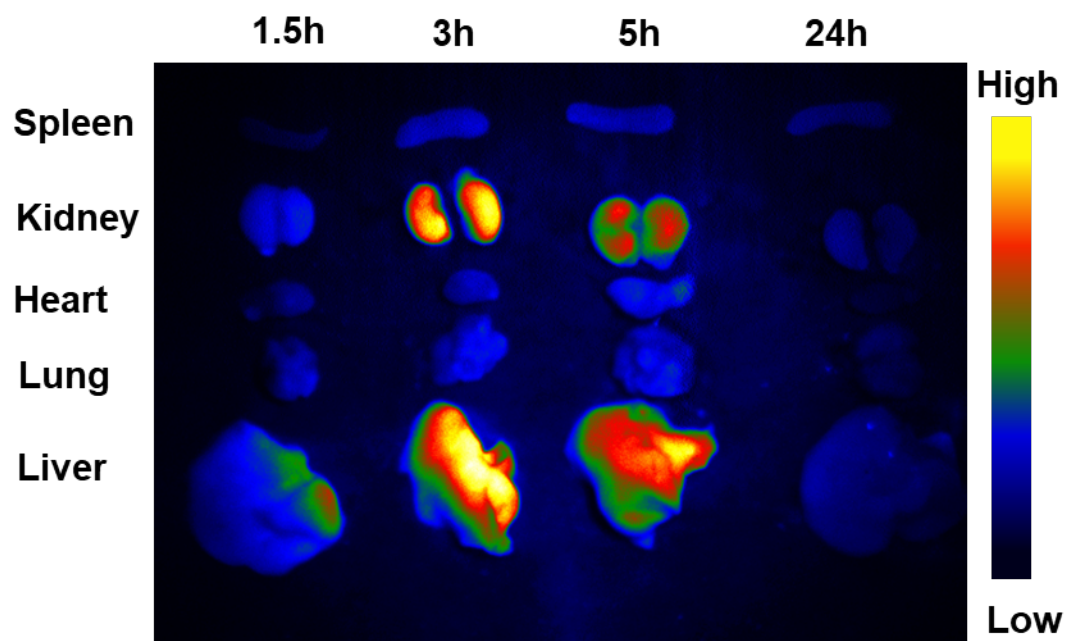

**Supplementary Fig. 16. NIR fluorescence images of main organs from nude mice after intraperitoneal injection at different time. CQDs : 200  $\mu\text{g}/\text{ml}$ , 100  $\mu\text{l}$ . 4T1 cells:  $1 \times 10^7/\text{ml}$ . Excitation: 655 nm. Filter: 710 nm.**



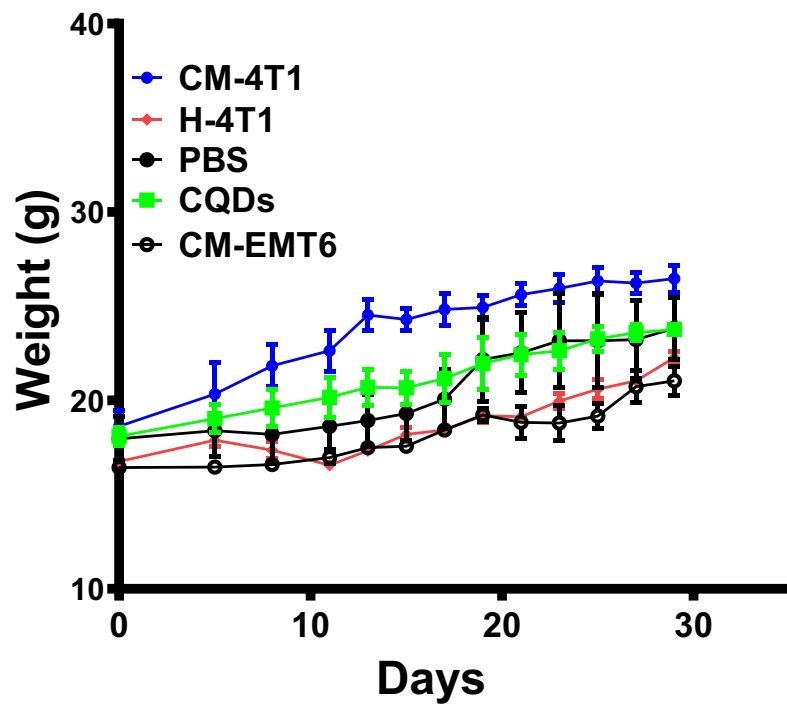

**Supplementary Fig. 17. Weight curves of mice in P0-P4 groups treated with CM-4T1 ( $n = 6$ ), CM-EMT6 ( $n = 6$ ), H-4T1 ( $n = 6$ ), PBS ( $n = 6$ ) and CQDs ( $n = 6$ ). Data plotted are mean  $\pm$  S.E.M.**



134

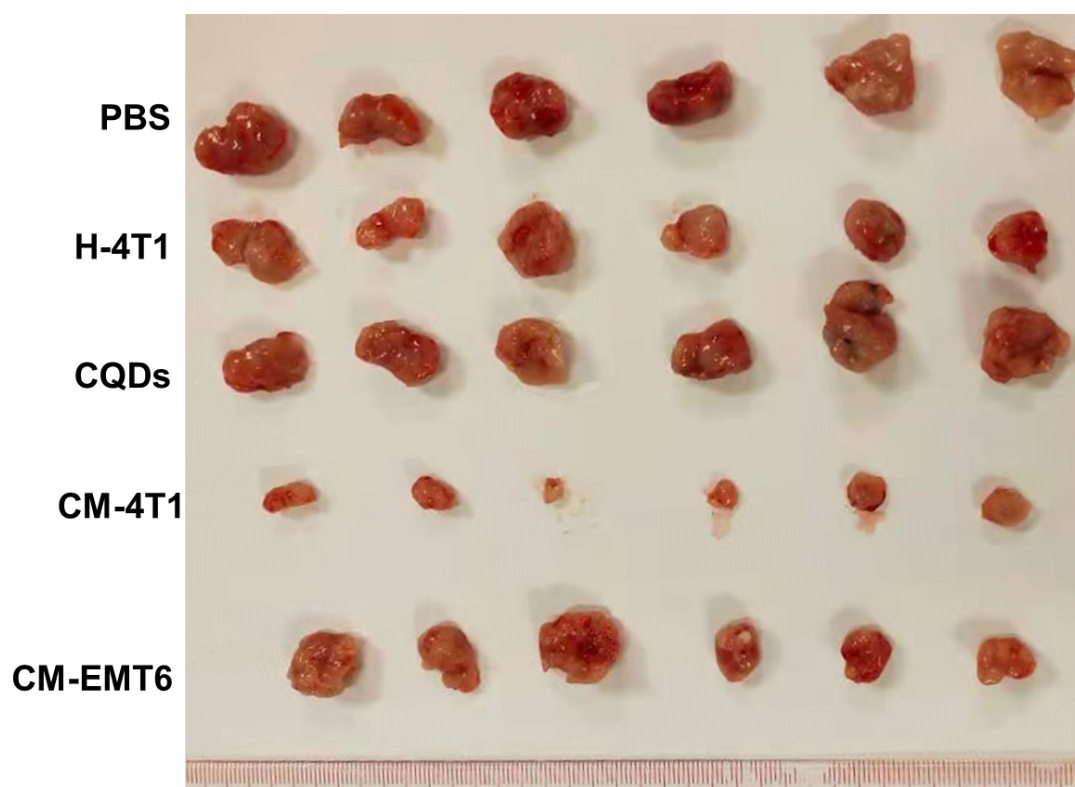

135

136

137 **Supplementary Fig. 18. Images of 4T1 primary tumors in fourth mammary glands**

138 **in P0-P4 groups** after PBS, H-4T1, CM-EMT6, CM-4T1 and CQDs treatments,

139 respectively. The mice were sacrificed on day 29 and measured tumor size.

140

141

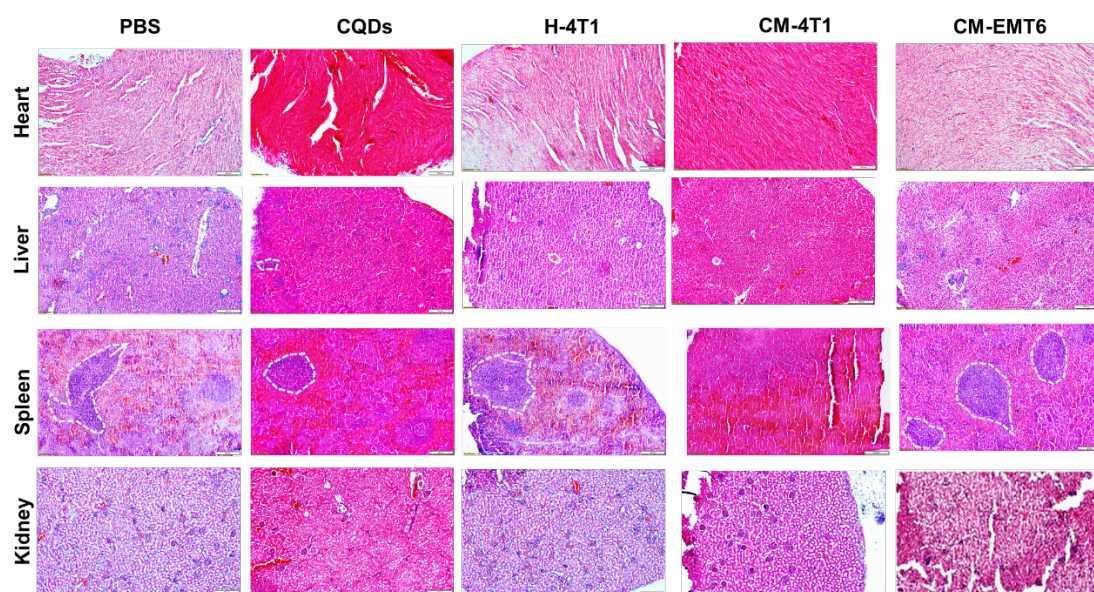

142

143

144 **Supplementary Fig. 19. H&E staining of heart, liver, spleen and kidney from P0-**

145 **P4 groups of 4T1 murine mammary model mice. Scale bar: 200  $\mu$ m. The mice were**

146 **sacrificed on day 29 and performed H&E staining.**

147

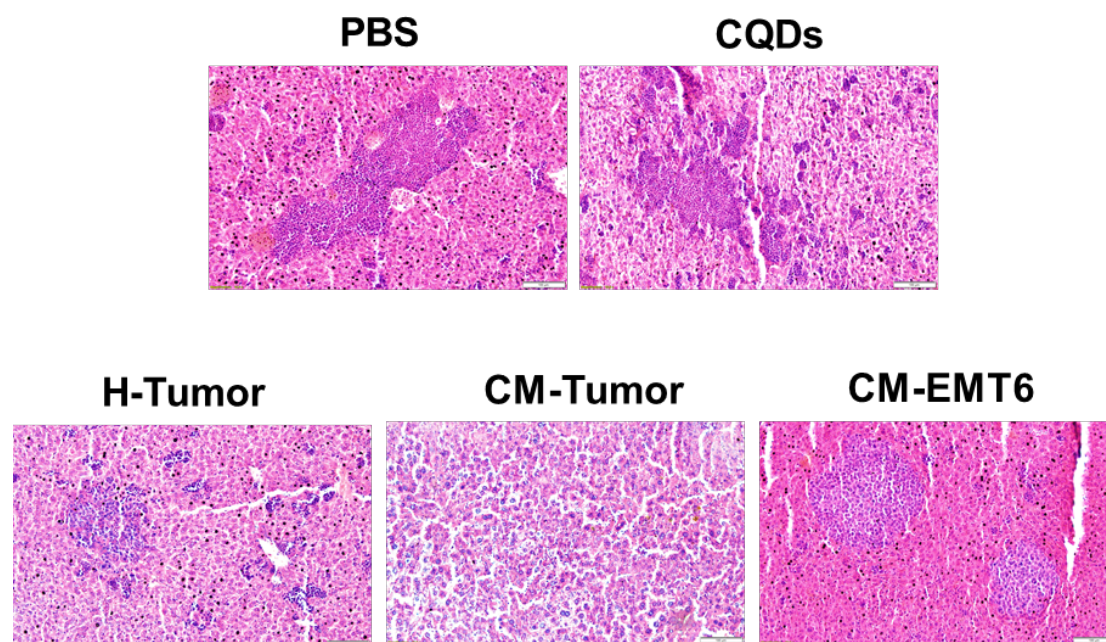

**Supplementary Fig. 20. H&E staining of liver tissues** from M0-M4 groups after PBS, CQDs, H-4T1, CM-EMT6 and CM-4T1 treatments, respectively. Scale bar: 100  $\mu$ m. The mice were sacrificed on day 29 and performed H&E staining.

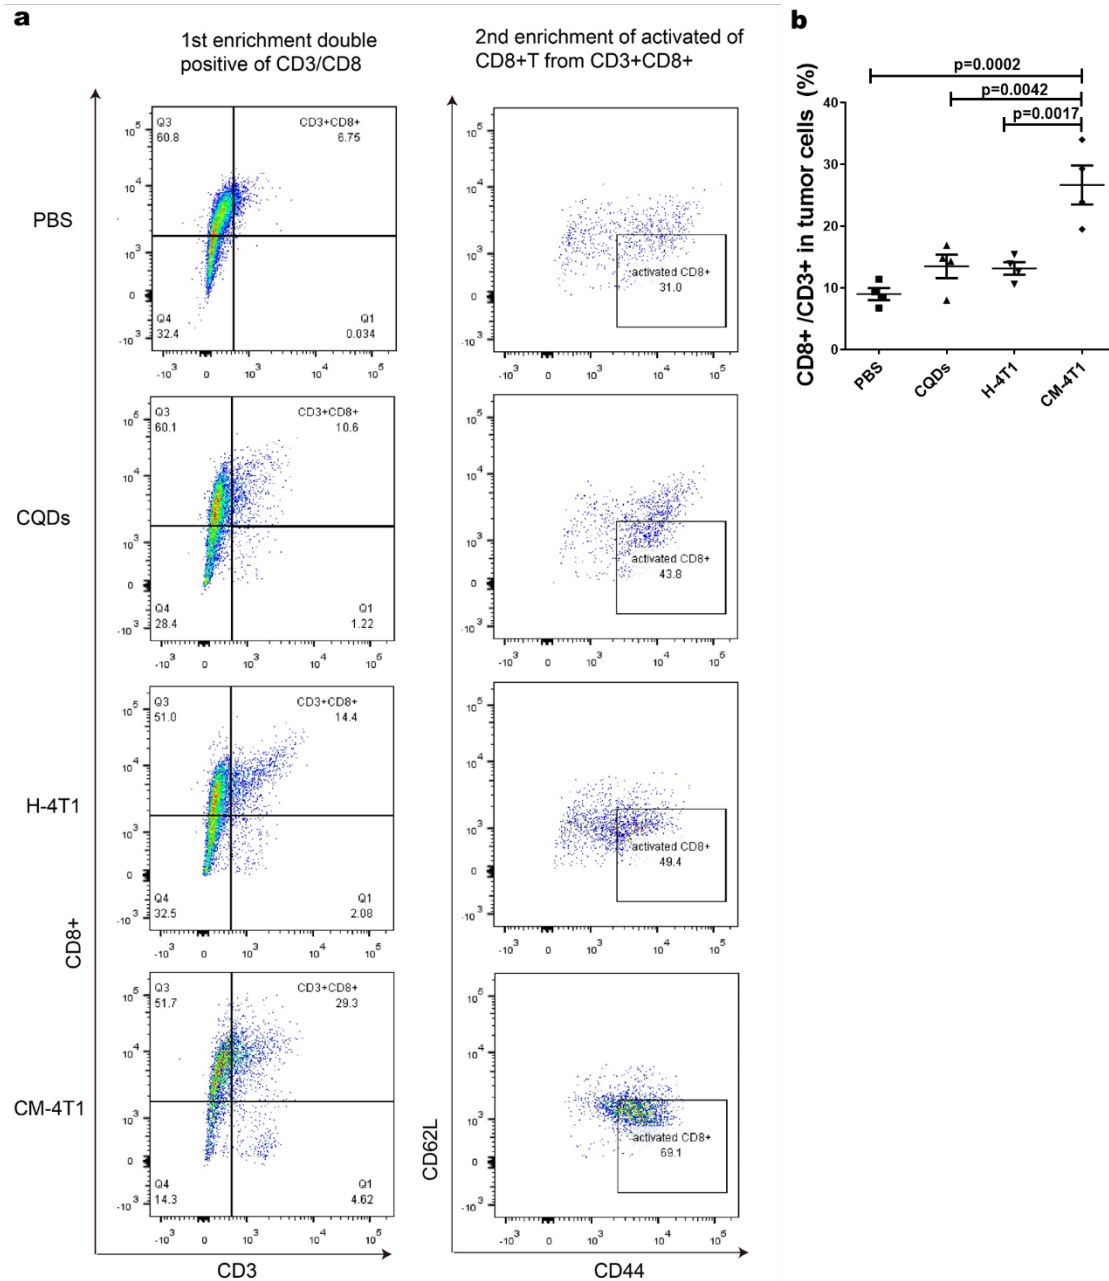

**Supplementary Fig. 21. Representative flow cytometry plots (a) and ratios (b) of activated CD8+ T cells in CD8<sup>+</sup>/CD3<sup>+</sup> (%) in the tumors from P0-3 groups after PBS, CQDs, H-4T1 and CM-4T1 treatments (*n*=4), respectively; Data plotted are mean ± S.E.M. The mice were sacrificed on day 29 and performed flow cytometry.**

160

**Supplementary Table. 1** Antibodies used for experiments.

| Item Description                     | Source       | Model / Cat. # | IHC/IF |
|--------------------------------------|--------------|----------------|--------|
| CD8α (D8A8Y) Rabbit mAb              | CST          | #85336         | 1:400  |
| F4/80 Monoclonal Antibody (BM8)      | eBioscience™ | #14-4801-82    | 1:100  |
| Cleaved Caspase-3 (Asp175) Antibody  | CST          | #9661          | 1:1000 |
| Recombinant Anti-Ki67 antibody [SP6] | Abcam        | ab16667        | 1:250  |
| CD11c (D1V9Y) Rabbit mAb             | CST          | #97585         | 1:400  |
| Anti-Interferon gamma antibody       | Abcam        | ab216642       | 1:200  |

161

**Supplementary Table 2** Antibodies used for experiments.

| Item Description                                           | Source                  | Model / Cat. #                      | Flow   |
|------------------------------------------------------------|-------------------------|-------------------------------------|--------|
| CD3e Monoclonal Antibody (145-2C11), Alexa Fluor 488       | ThermoFisher Scientific | Cat# 53-0031-82;<br>RRID:AB_469889  | 1:1000 |
| CD8a Monoclonal Antibody (53-6.7), PerCP-eFluor 710        | ThermoFisher Scientific | Cat# 46-0081-82;<br>RRID:AB_1834433 | 1:1000 |
| CD44 Monoclonal Antibody (IM7), PE                         | ThermoFisher Scientific | Cat# 12-0441-82;<br>RRID:AB_465664  | 1:1000 |
| CD62L (L-Selectin) Monoclonal Antibody (MEL14), eFluor 450 | ThermoFisher Scientific | Cat# 48-0621-82;<br>RRID:AB_1963590 | 1:1000 |
| F4/80 Monoclonal Antibody (BM8), eFluor 450                | ThermoFisher Scientific | Cat# 14-4801-82;<br>RRID:AB_1548747 | 1:1000 |
| CD206 (MMR) Monoclonal Antibody (MR6F3), APC               | ThermoFisher Scientific | Cat# 17-2061-82;<br>RRID AB_2637420 | 1:1000 |
